# Supplementary material for: Implementation of mycorrhizal mechanisms into soil carbon model improves the prediction of long-term processes of plant litter decomposition
Source: Copernicus journal article supplement (doi:10.5194/bg-19-1469-2022), 2022-03-14

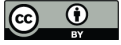

*Supplement of*

## **Implementation of mycorrhizal mechanisms into soil carbon model improves the prediction of long-term processes of plant litter decomposition**

**Weilin Huang et al.**

*Correspondence to:* Weilin Huang (w.huang@cml.leidenuniv.nl)

The copyright of individual parts of the supplement might differ from the article licence.

Fig.S1 Dynamics of plant foliage litter decomposition as a result of variation in the dominance of AM vegetation (0~1). (a) Loss of total carbon mass from plant litter. (b, c, d) Dynamics of loss of labile carbon components (*W* – water-soluble C pool, *A* – acid-hydrolysable C pool, *E* – ethanol-soluble C pool). (e) Dynamics of loss of recalcitrant (non-hydrolysable) carbon (*N* pool). The initial *W*, *A*, *E*, and *N* composition of decomposition material is 25% – *W*, 45% – *A*, 12% – *E*, and 18% – *N* (typical for plant foliage).

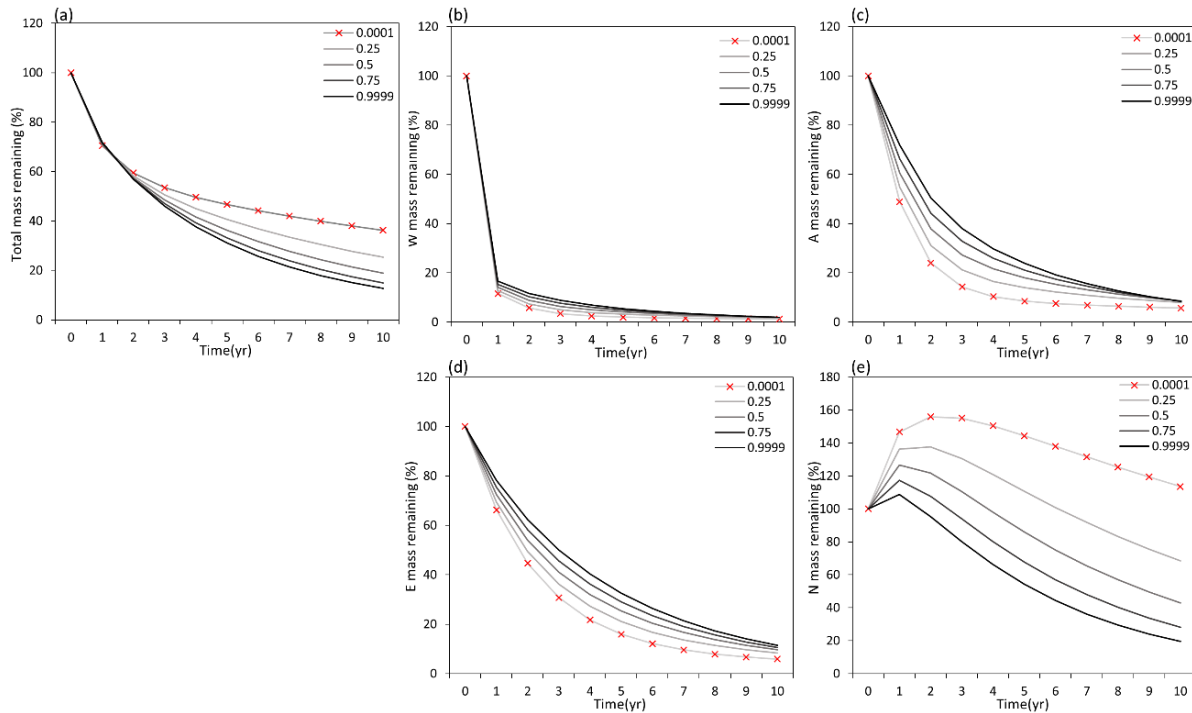

Fig.S2 Dynamics of plant foliage litter decomposition as a result of variation in dominance of EM vegetation (0~1). (a) Loss of total carbon mass from plant litter. (b, c, d) Dynamics of loss of labile carbon components (*W* – water-soluble C pool, *A* – acid-hydrolysable C pool, *E* – ethanol-soluble C pool). (e) Dynamics of loss of recalcitrant (non-hydrolysable) carbon (*N* pool). The initial *W*, *A*, *E*, and *N* composition of decomposition material is 25% – *W*, 45% – *A*, 12% – *E*, and 18% – *N* (typical for plant foliage).

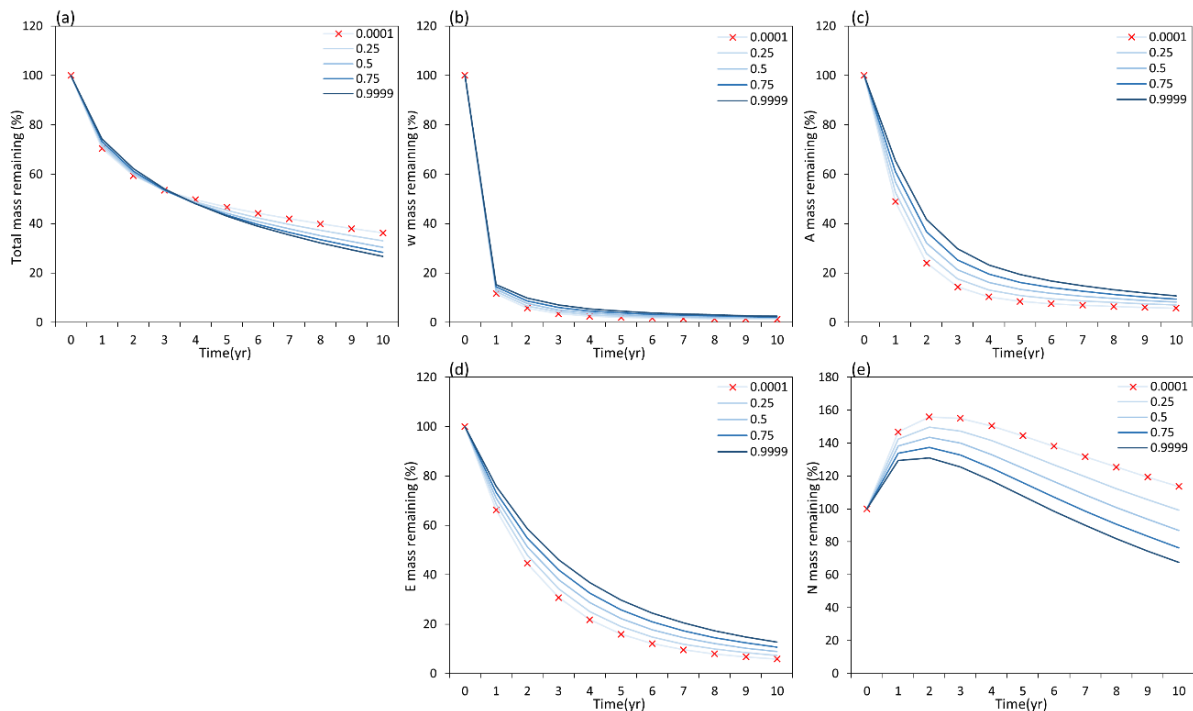

Supplement: Supplementary file 1 [file bg-19-1469-2022-supplement.pdf]
